# Supplementary material
Source: publisher figshare collection journal article supplement (https://acs.figshare.com/ndownloader/files/7708408)

## Supporting Information

### Unambiguous Identification of Serine and Threonine Pyrophosphorylation Using Neutral-Loss-Triggered Electron-Transfer/Higher-Energy Collision Dissociation (EThcD)

Martin Penkert<sup>a,b</sup>, Lisa M. Yates<sup>c</sup>, Michael Schümann<sup>a</sup>, David Perlman<sup>d</sup>, Dorothea Fiedler<sup>a,b</sup>, Eberhard Krause<sup>\*a</sup>

<sup>a</sup> Leibniz Institut für Molekulare Pharmakologie (FMP), Robert-Rössle Str. 10, 13125 Berlin, Germany

<sup>b</sup> Humboldt Universität zu Berlin, Department of Chemistry, Brook-Taylor-Straße 2, 12489 Berlin, Germany

<sup>c</sup> Princeton University, Department of Chemistry, Frick Chemistry Building, Washington Road, Princeton, NJ 08544, USA

<sup>d</sup> Princeton University, Department of Molecular Biology, 119 Lewis Thomas Laboratory, Washington Road, Princeton, NJ 08544, USA

## Table of Content

### Supplementary Figures

|                                                                                                                                                       |         |
|-------------------------------------------------------------------------------------------------------------------------------------------------------|---------|
| Representative HCD MS/MS spectra                                                                                                                      | 3       |
| Figure S1. HCD MS/MS spectrum of peptide ISIDppSSDEESELKK ( <b>PP-4</b> )                                                                             | 3       |
| Figure S2. HCD MS/MS spectrum of peptide SKVEDAEYEppSSDDEDEKLDK ( <b>PP-6</b> )                                                                       | 3       |
| <br>Representative CID MS/MS spectra                                                                                                                  | <br>4   |
| Figure S3. Comparison of CID MS/MS spectrum of peptide RSHHDDEEEpSpSEKK ( <b>P<sub>2</sub>-5</b> ) and peptide RSHHDDEEEppSSEKK ( <b>PP-5</b> )       | 4       |
| Figure S4. Comparison of CID MS/MS spectrum of peptide ISIDppSSDEESELKK ( <b>PP-4</b> ) and peptide ISIDppTSDEESELKK ( <b>PP-8</b> )                  | 4       |
| <br>Representative EThcD MS/MS spectra of triply charged precursor ions                                                                               | <br>5-6 |
| Figure S5. EThcD MS/MS spectrum of peptide ISIDpSpSDEESELKK ( <b>P<sub>2</sub>-4</b> )                                                                | 5       |
| Figure S6. EThcD MS/MS spectrum of peptide RSHHDDEEEpSpSEKK ( <b>PP-5</b> )                                                                           | 5       |
| Figure S7. EThcD MS/MS spectrum of peptide SKVEDAEYEppSSDDEDEKLDK ( <b>PP-6</b> )                                                                     | 6       |
| <br>Representative EThcD MS/MS spectra of doubly charged precursor                                                                                    | <br>7   |
| Figure S8. EThcD MS/MS spectrum of peptide VNEDSPSpSSSK ( <b>PP-1</b> )                                                                               | 7       |
| Figure S9. EThcD MS/MS spectrum of peptide SSDSSppSDSESESK ( <b>PP-3</b> )                                                                            | 7       |
| <br>Chromatographic behavior of di- and pyrophosphorylated peptides                                                                                   | <br>8   |
| Figure S10. Extracted ion chromatograms (XIC) of the synthetic peptides <b>P<sub>2</sub>-6</b> , <b>PP-6</b> , <b>P<sub>2</sub>-4</b> and <b>PP-4</b> | 8       |
| Figure S11. Spike-in experiment peptide ISIDppTSDEESELKK ( <b>PP-8</b> )                                                                              | 9       |
| Characterization of synthetic pyrophosphopeptides ( <b>PP-1-8</b> )                                                                                   | 10-17   |

## Supplementary Figures

### Representative HCD MS/MS spectra

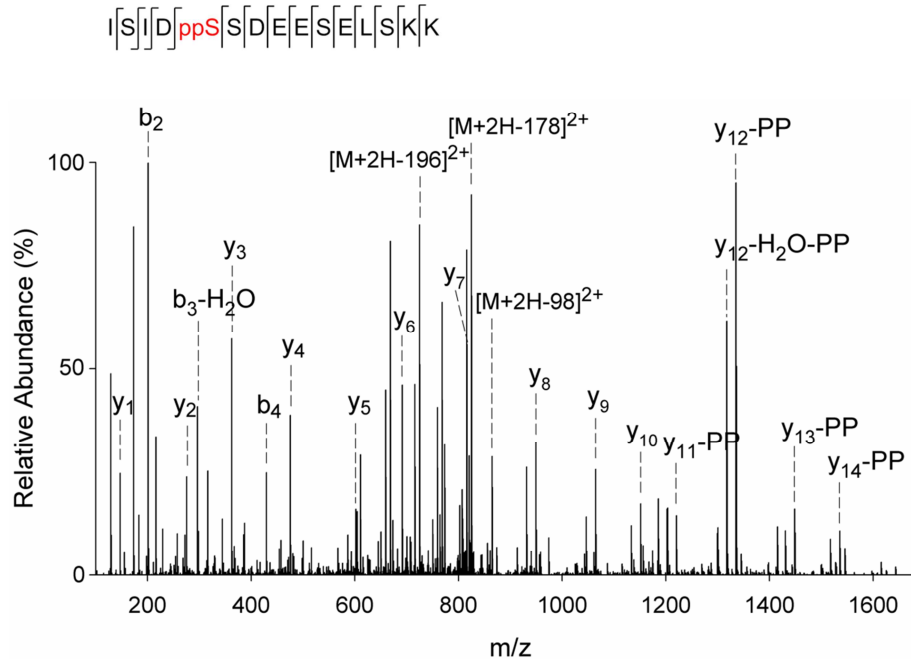

Figure S1. HCD MS/MS spectrum of doubly charged peptide ISIDppSSDEESELKK (**PP-4**)

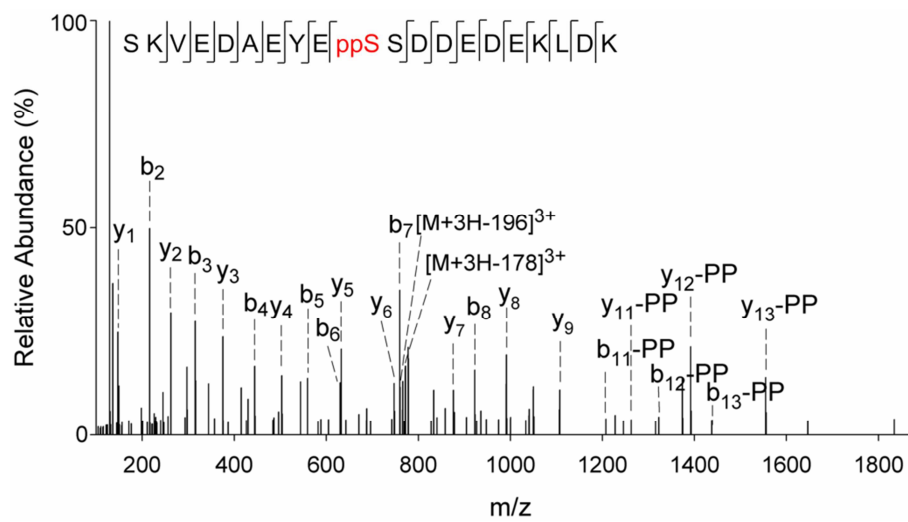

Figure S2. HCD MS/MS spectrum of triply charged peptide SKVEDAEYEppSSDDEDEKLDDK (**PP-6**)

## Representative CID MS/MS spectra

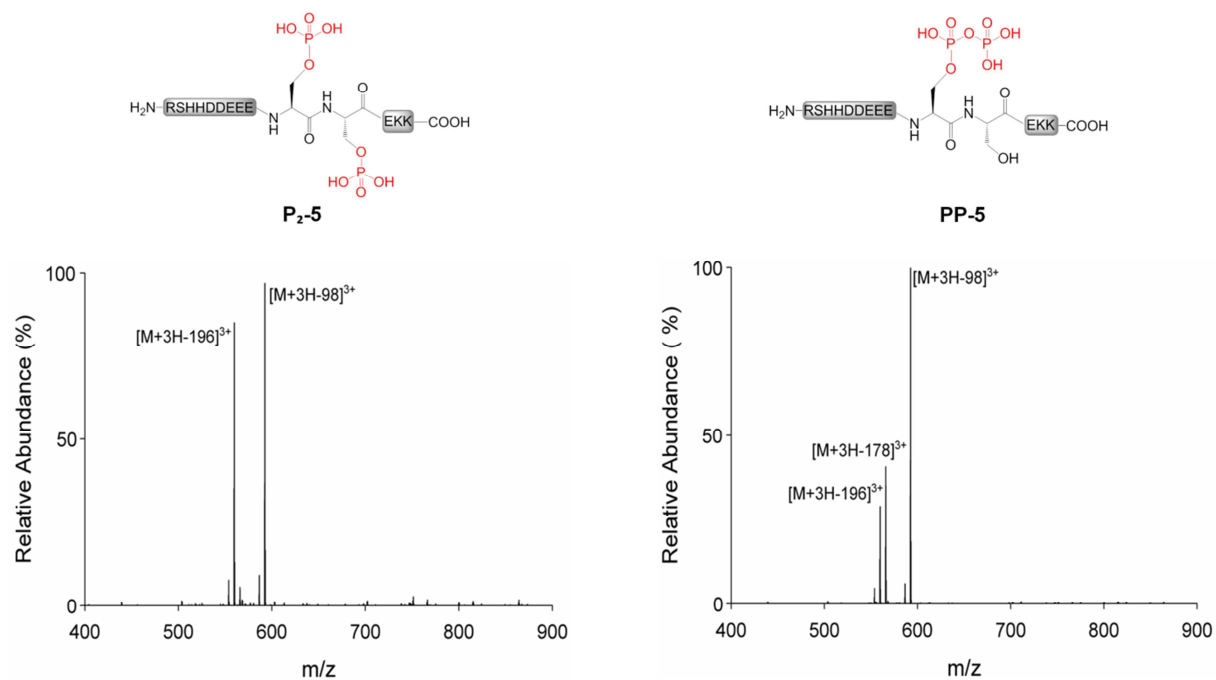

Figure S3. Comparison of CID MS/MS spectrum of triply charged peptide RSHHDDEEEpSpSEKK (**P<sub>2</sub>-5**) and peptide RSHHDDEEEppSSEKK (**PP-5**)

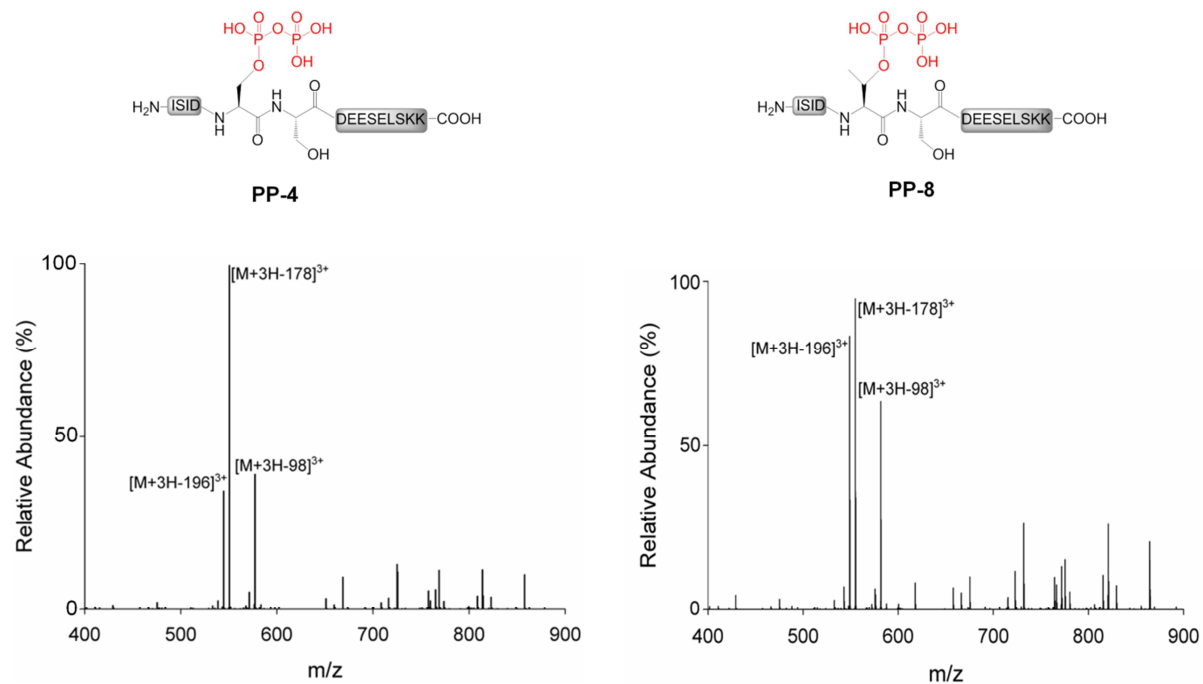

Figure S4. Comparison of CID MS/MS spectrum of triply charged peptide ISIDppSSDEESELKK (**PP-4**) and peptide ISIDppTSDEESELKK (**PP-8**)

## Representative EThcD MS/MS spectra of triply charged precursor ions

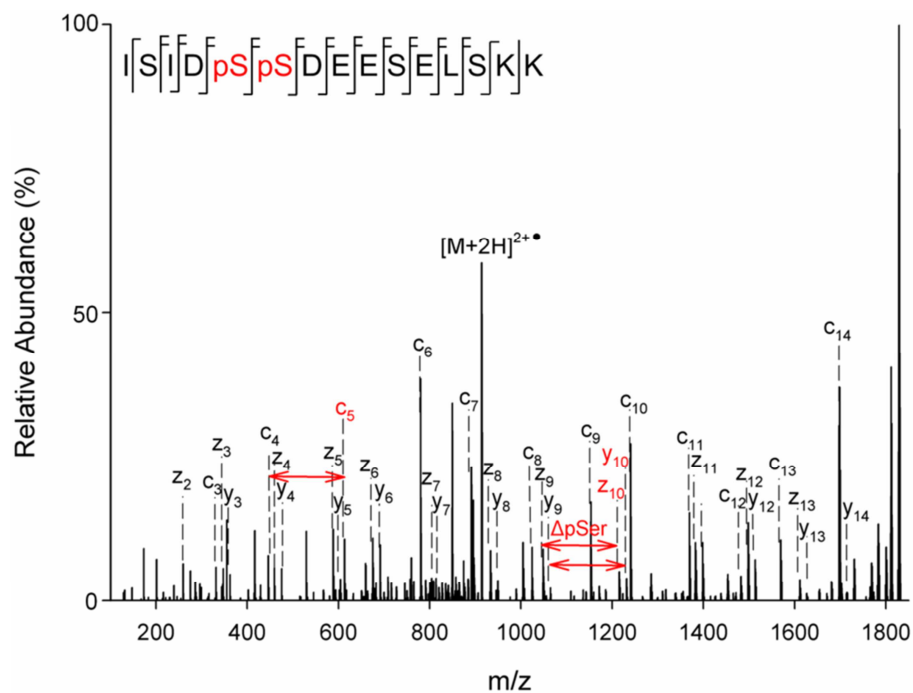

Figure S5. EThcD MS/MS spectrum of triply charged peptide ISIDpSpSDEESEL SKK (P<sub>2</sub>-4)

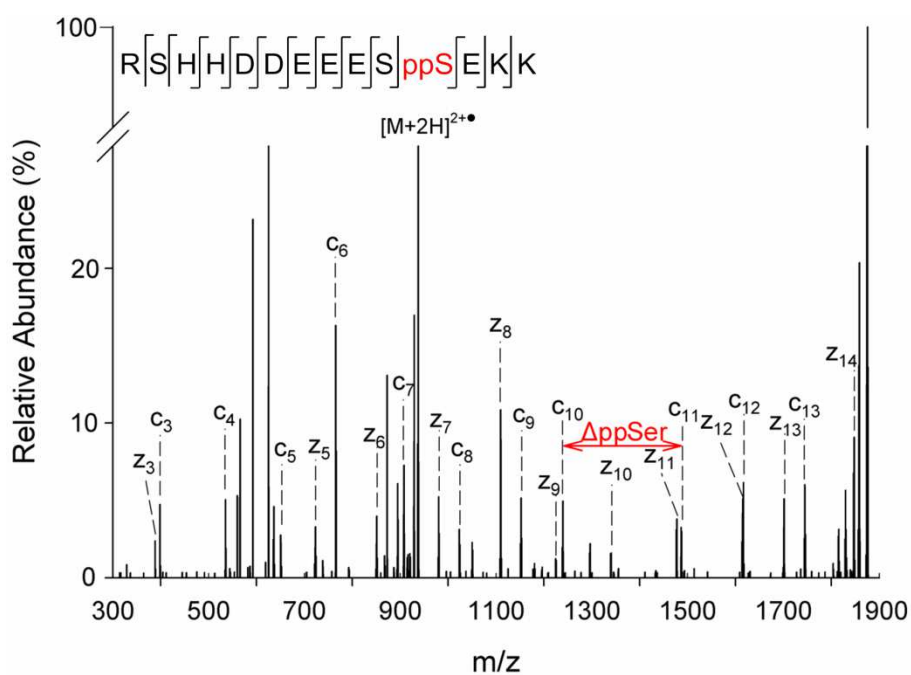

Figure S6. EThcD MS/MS spectrum of triply charged peptide RSHHDDEEESppSEKK (PP-5)

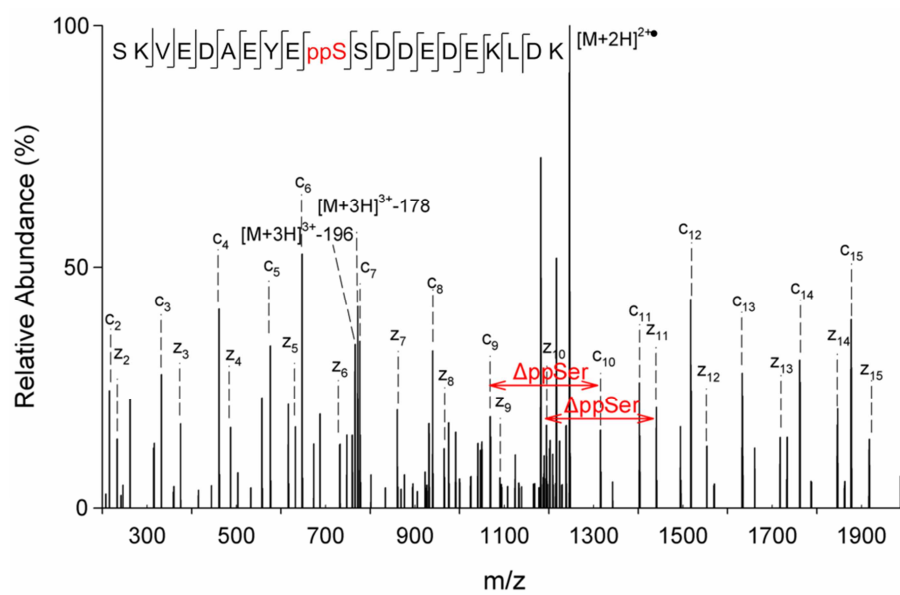

Figure S7. ETHcD MS/MS spectrum of triply charged peptide SKVEDAEYEppSSDDEDEKLDK (PP-6)

## Representative EThcD MS/MS spectra of doubly charged precursor ions

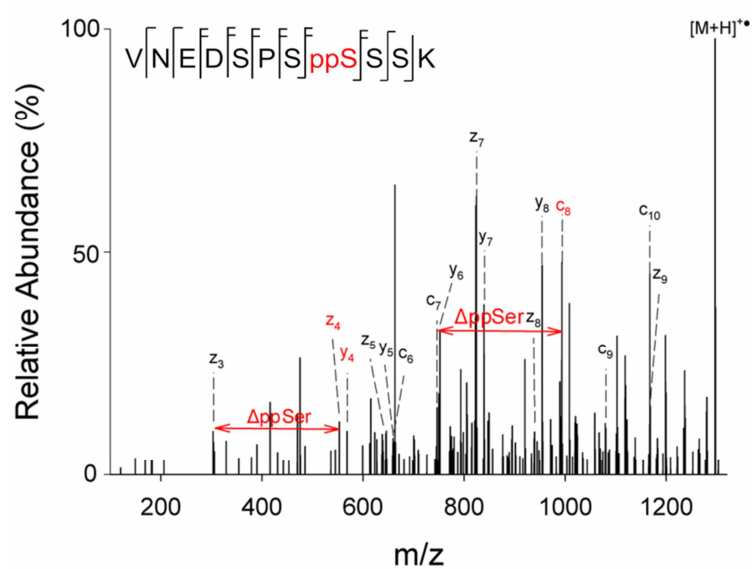

Figure S8. EThcD MS/MS spectrum of doubly charged peptide VNEDSPppSSSK (**PP-1**)

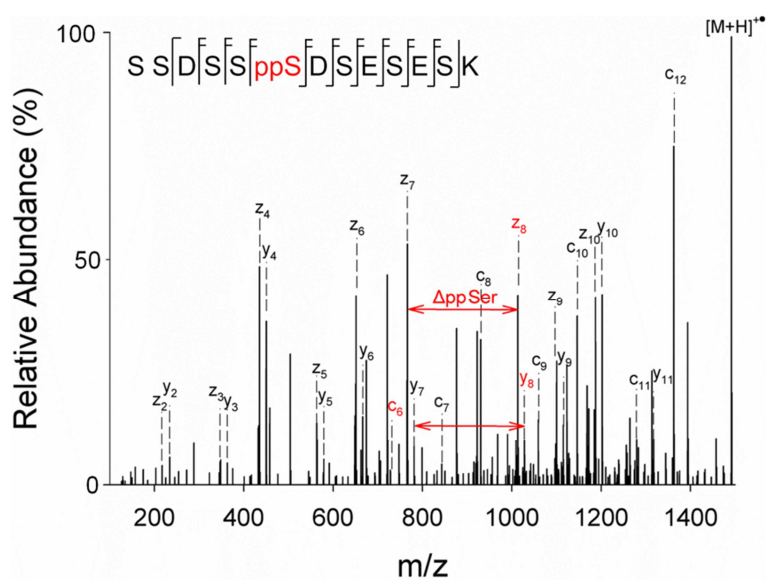

Figure S9. EThcD MS/MS spectrum of doubly charged peptide SSDSppSDSESESK (**PP-3**)

## Chromatographic behavior of di- and pyrophosphorylated peptides

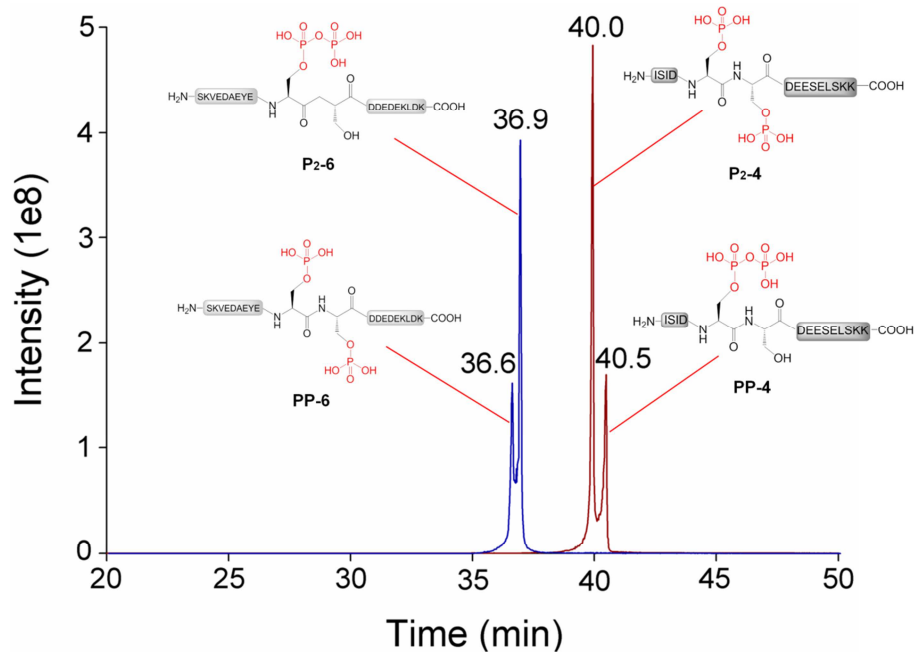

Figure S10. Extracted ion chromatograms (XIC) of the synthetic peptides **P2-6**, **PP-6** ( $m/z$  830.982; blue line), **P2-4** and **PP-4** ( $m/z$  913.873; red line) showing the similar chromatographic behavior of di- and pyrophosphorylated peptides. The doubly phosphorylated peptides exhibit shorter retention times than the pyrophosphorylated counterpart.



# **Spike-in experiment peptide ISIDppTSDEESELKK (PP-8)**

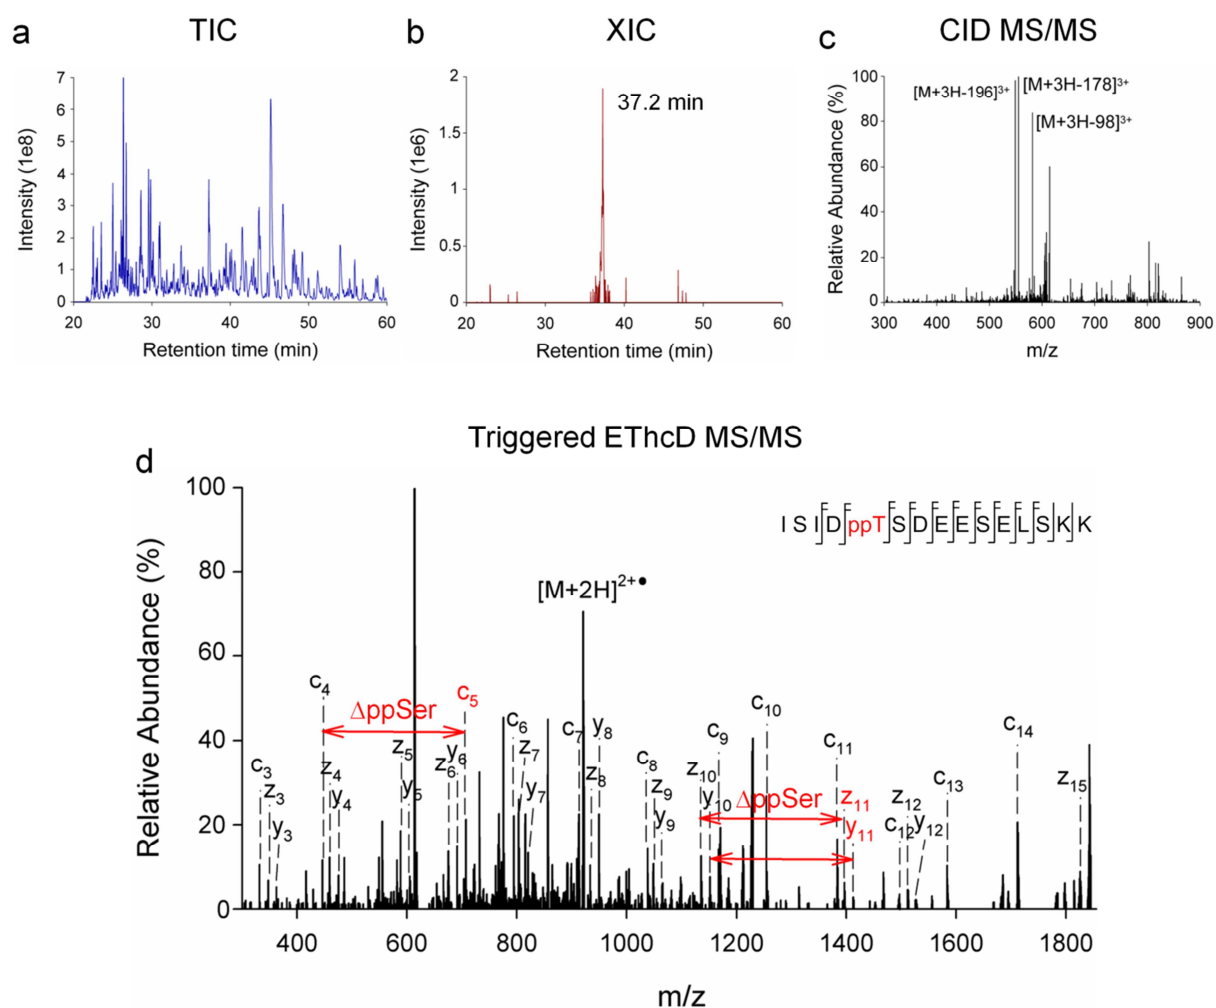

Figure S11. Detection of a synthetic pyrophosphopeptide in a spike-in experiment using the DDNL-ETHcD approach. (a) Total ion chromatogram (TIC) of the HeLa protein digest. (b) Extracted ion chromatogram (XIC)  $m/z$  614.255 of the synthetic peptide **PP-8**. (c) CID MS/MS spectrum of peptide **PP-8** acquired at a retention time of 37.23 min indicating dominant neutral losses of 98, 178 and 196 Da. (d) Triggered ETHcD MS/MS spectrum of the pyrophosphorylated peptide ISIDppTSDEESELKK showing gapless sequence coverage without loss of the labile modification. Fragment ions pinpointing the site of modification are labeled in red.

## Characterization of synthetic pyrophosphopeptides

### Peptide **PP-1** (VNEDSPSpSSSK)

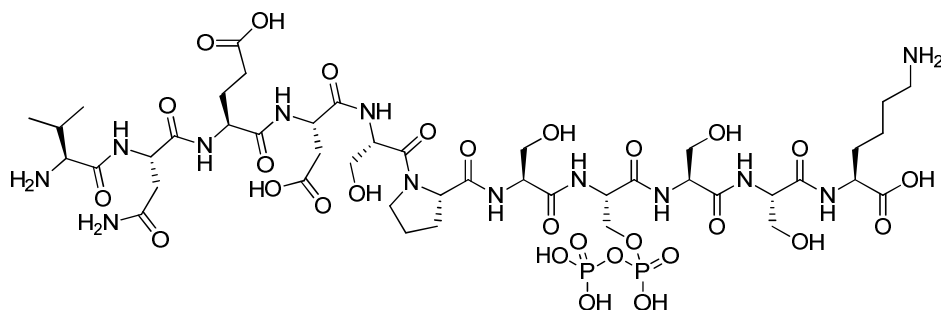

The purity of the isolated peptide was confirmed by analytical HPLC [C18;  $t = 0$  min 0% of solvent B in solvent A,  $t = 20$  min 20% of solvent B in solvent A; 1 mL/min; 214 nm;  $T_R = 8.483$  min &  $T_R = 8.805$  min]. Both peaks in the analytical HPLC were collected and HRMS confirmed that both fractions contained pyrophosphopeptide **PP-1** as the primary product (HRMS (Bulk Material)  $[M+H]^+$  calcd for  $C_{44}H_{76}N_{13}O_{28}P_2^+$  1296.4393, found 1296.4463;  $[M+2H]^{2+}$  calcd for  $C_{44}H_{77}N_{13}O_{28}P_2^{2+}$  648.7233, found 648.7255;  $[M+2H+Na]^{3+}$  calcd for  $C_{44}H_{77}N_{13}NaO_{28}P_2^{3+}$  440.8133, found 440.8070) and  $^{31}P$  NMR (202 MHz,  $H_2O$ , pH = 7.70)  $\delta$  -6.78 (d,  $^2J_{P-P} = 27.8$  Hz), -10.73 (d,  $^2J_{P-P} = 19.9$  Hz).

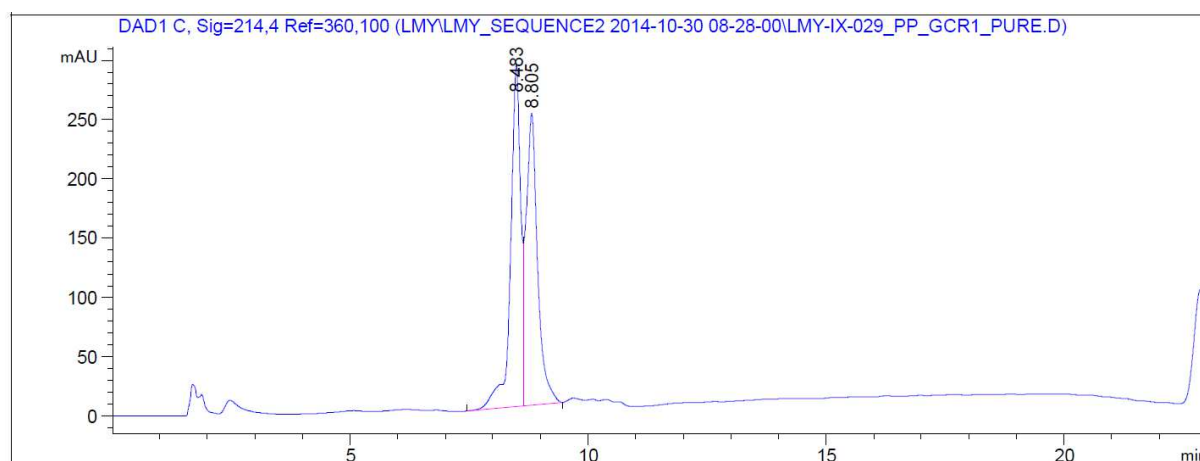

Peptide **PP-2** (SSEDppSSEEDKA)

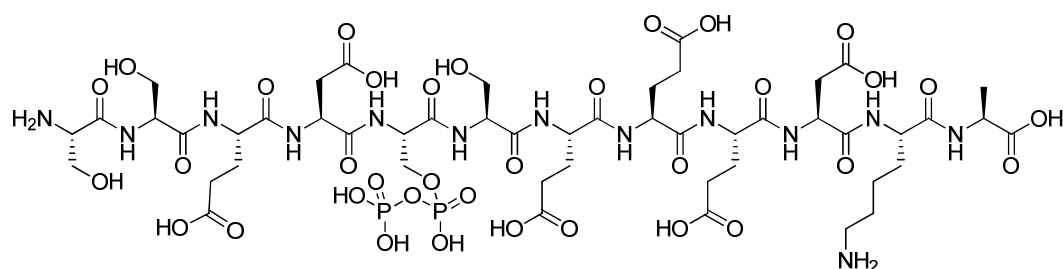

The purity of the isolated peptide was confirmed by analytical HPLC [C18;  $t = 0$  min 0% of solvent B in solvent A,  $t = 20$  min 20% of solvent B in solvent A; 1 mL/min; 214 nm;  $T_R = 9.610$  min], and the identity of pyrophosphopeptide **PP-2** was confirmed by mass spectrometry (HRMS  $[M+H]^+$  calcd for  $C_{49}H_{80}N_{13}O_{35}P_2^+$  1472.4350, found 1472.4332;  $[M+2H]^{2+}$  calcd for  $C_{49}H_{81}N_{13}O_{35}P_2^{2+}$  736.7211, found 736.72125;  $[M+2H+Na]^{3+}$  calcd for  $C_{49}H_{81}N_{13}NaO_{35}P_2^{3+}$  499.4794, found 499.4697) and  $^{31}P$  NMR (202 MHz,  $H_2O$ , pH = 7.59)  $\delta$  -6.84 (d,  $^2J_{P-P} = 20.5$  Hz), -10.87 (d,  $^2J_{P-P} = 21.1$  Hz).

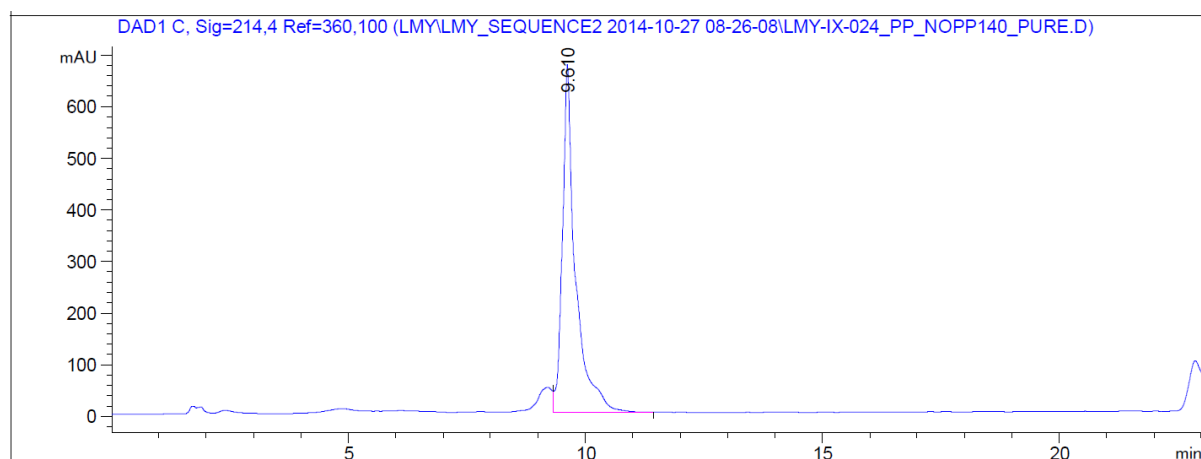

Peptide **PP-3** (SSEDppSSEEDKA)

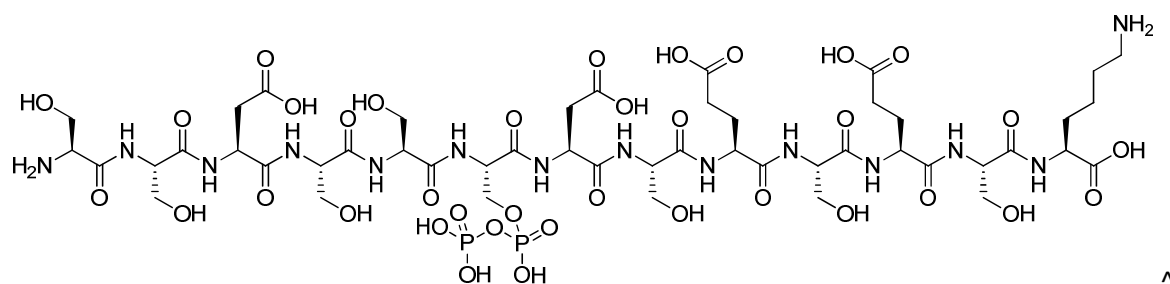

The purity of the isolated peptide was confirmed by analytical HPLC [C18; t = 0 min 0% of solvent B in solvent A, t = 20 min 20% of solvent B in solvent A; 1 mL/min; 214 nm; T<sub>R</sub> = 6.433 min], and the identity of the pyrophosphopeptide **PP-3** was confirmed by mass spectrometry (HRMS [M+H+Na]<sup>2+</sup> calcd for C<sub>48</sub>H<sub>81</sub>N<sub>14</sub>O<sub>36</sub>P<sub>2</sub><sup>+</sup> 1491.4408, found 1491.4410; [M+2H]<sup>2+</sup> calcd for C<sub>48</sub>H<sub>82</sub>N<sub>14</sub>O<sub>36</sub>P<sub>2</sub><sup>2+</sup> 746.2240, found 746.2255; [M+2H+Na]<sup>3+</sup> calcd for C<sub>48</sub>H<sub>82</sub>N<sub>14</sub>NaO<sub>36</sub>P<sub>2</sub><sup>3+</sup> 505.8147, found 505.8057) and <sup>31</sup>P NMR (202 MHz, H<sub>2</sub>O, pH = 7.67) δ -6.57 (d, <sup>2</sup>J<sub>P-P</sub> 21.8 Hz), -10.81 (d, <sup>2</sup>J<sub>P-P</sub> = 21.1 Hz).

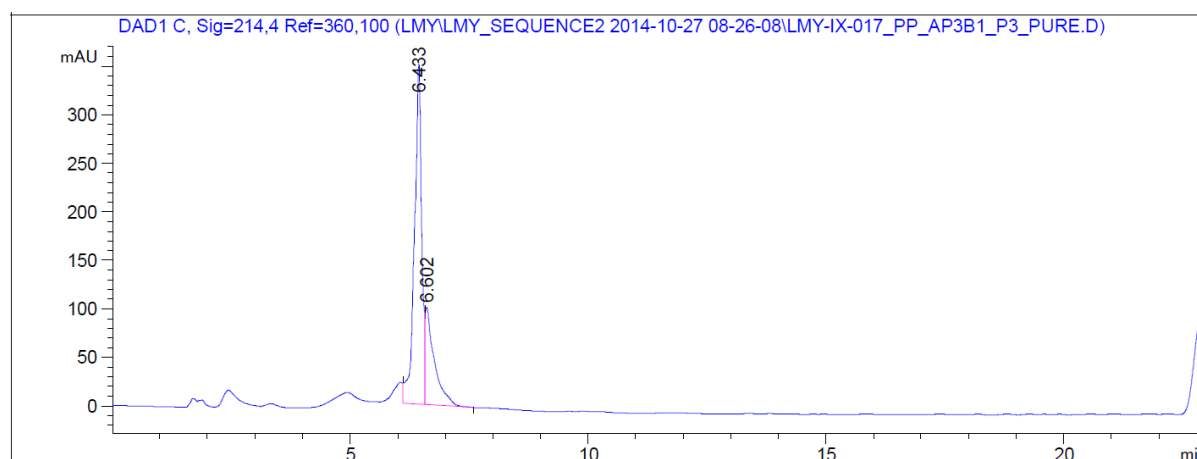

Peptide **PP-4** (ISIDppSSDEESELKK)

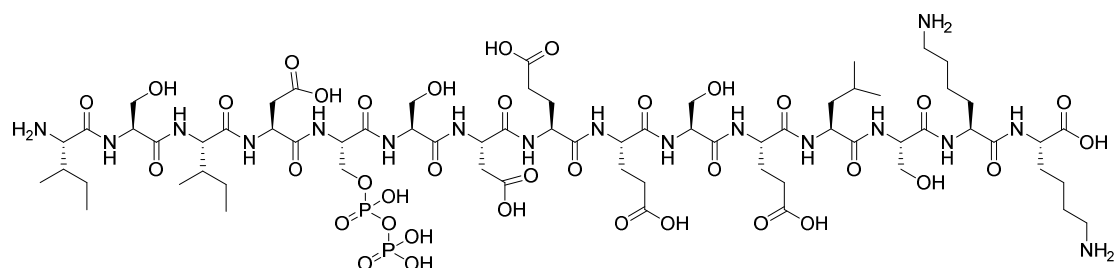

The purity of the isolated peptide was confirmed by analytical HPLC [C18; t = 0 min 0% of solvent B in solvent A; t = 20 min 47% of solvent B in solvent A; 1 mL/min; 214 nm;  $T_R$  = 13.957 min], and the identity of pyrophosphopeptide **PP-4** was confirmed by mass spectrometry (HRMS  $[M+2H]^{2+}$  calcd for  $C_{68}H_{119}N_{17}O_{37}P_2^{2+}$  913.8709, found 913.8686;  $[M+3H]^{3+}$  calcd for  $C_{68}H_{119}N_{17}O_{37}P_2^{2+}$  609.5830, found 609.5823) and  $^{31}P$  NMR (202 MHz,  $H_2O$ , pH = 8.07)  $\delta$  -6.77 (d,  $^2J_{P-P}$  = 20.5 Hz), -10.99 (d,  $^2J_{P-P}$  = 21.7 Hz).

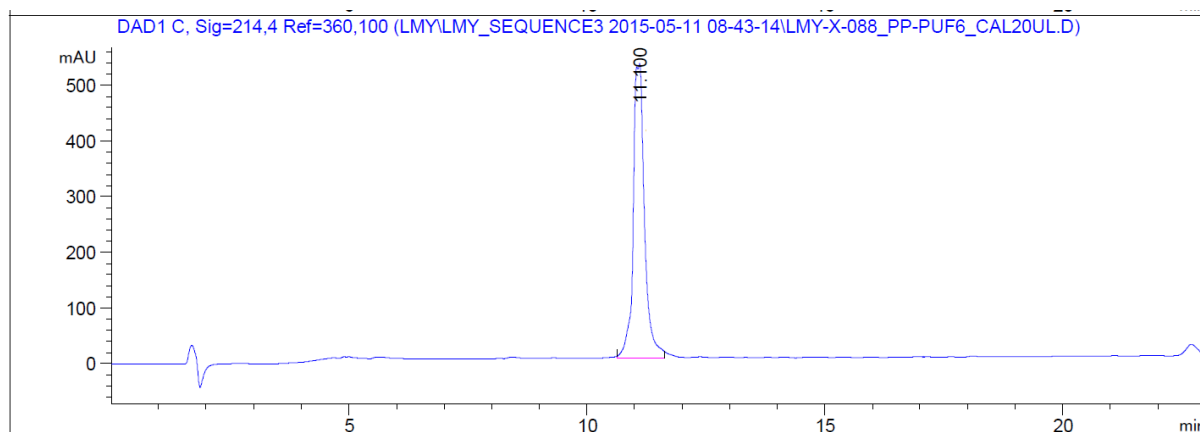

Peptide **PP-5** (RSHHDDEEESppSEKK)

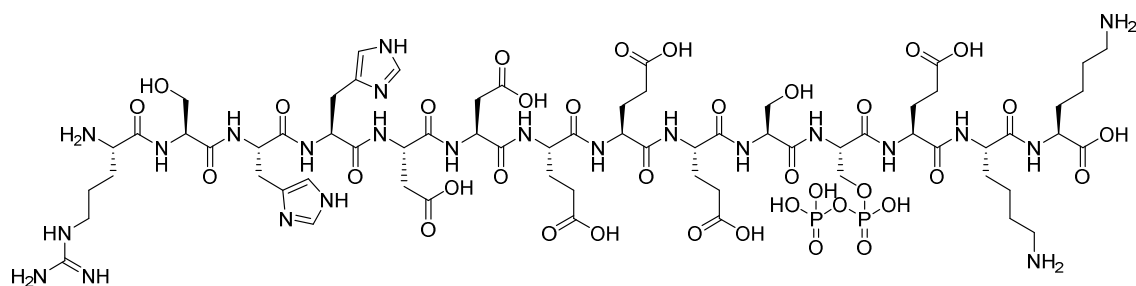

The purity of the isolated peptide was confirmed by analytical HPLC [C18; t = 0 min 3% of solvent B in solvent A; t = 13 min 15% of solvent B in solvent A; 1 mL/min; 214 nm; T<sub>R</sub> = 8.637 min], and the identity of pyrophosphopeptide **PP-5** was confirmed by mass spectrometry (HRMS [M+2H]<sup>2+</sup> calcd for C<sub>95</sub>H<sub>151</sub>N<sub>23</sub>O<sub>51</sub>P<sub>2</sub><sup>2+</sup> 936.8362, found 936.8294; [M+3H]<sup>3+</sup> calcd for C<sub>95</sub>H<sub>152</sub>N<sub>23</sub>O<sub>51</sub>P<sub>2</sub><sup>3+</sup> 624.8908, found 624.8833; [M+Na+3H]<sup>4+</sup> calcd for C<sub>95</sub>H<sub>152</sub>N<sub>23</sub>NaO<sub>51</sub>P<sub>2</sub><sup>4+</sup> 468.9181, found 468.9133) and <sup>31</sup>P NMR (202 MHz, H<sub>2</sub>O, pH = 7.91) δ -6.27 (d, , <sup>2</sup>J<sub>P,P</sub> = 21.8 Hz), -10.76 (d, , <sup>2</sup>J<sub>P,P</sub> = 21.4 Hz).

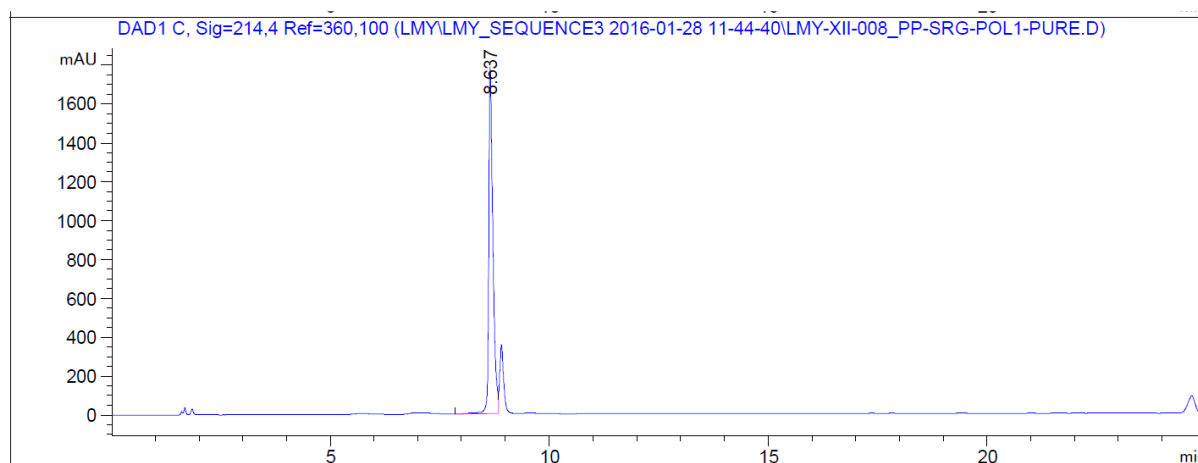

Peptide **PP-6** (SKVEDAEYEppSSDDEDEKLDK)

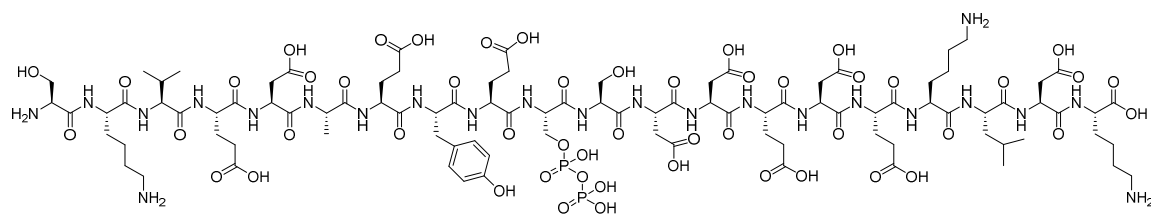

The purity of the isolated peptide was confirmed by analytical HPLC [C18; t = 0 min 0% of solvent B in solvent A; t = 20 min 47% of solvent B in solvent A; 1 mL/min; 214 nm;  $T_R$  = 10.351 min], and the identity of pyrophosphopeptide **PP-6** was confirmed by mass spectrometry (HRMS  $[M+2H]^{2+}$  calcd for  $C_{95}H_{151}N_{23}O_{51}P_2^{2+}$  1246.4714, found 1246.4687;  $[M+3H]^{3+}$  calcd for  $C_{95}H_{152}N_{23}O_{51}P_2^{3+}$  831.3167, found 831.3180;  $[M+Na+3H]^{4+}$  calcd for  $C_{95}H_{152}N_{23}NaO_{51}P_2^{4+}$  629.2348, found 629.7307) and  $^{31}P$  NMR (202 MHz,  $H_2O$ , pH = 7.94)  $\delta$  -6.64 (d, ,  $^2J_{P-P}$  = 21.7 Hz), -10.78 (d, ,  $^2J_{P-P}$  = 21.5 Hz).

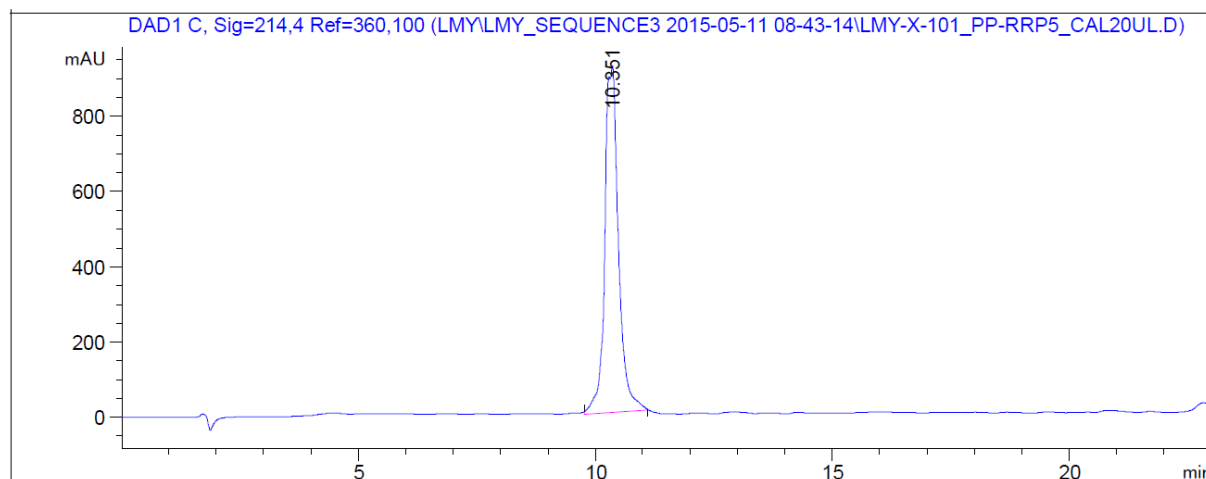

Peptide **PP-7** (SHHDDEEESppSEKKK)

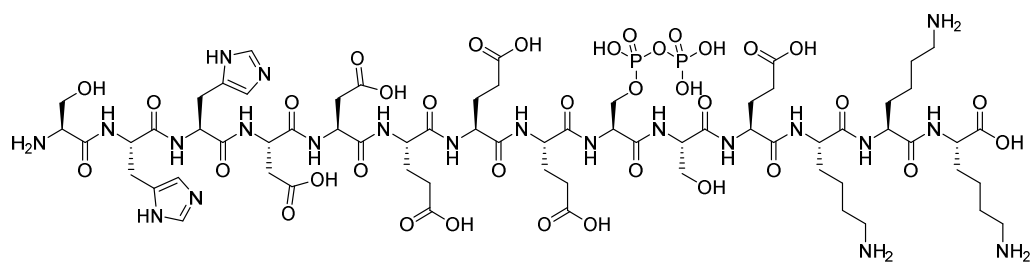

Using Procedure B, pyrophosphopeptide **xxx** was prepared from phosphopeptide **xxx** (11.5 mg, 6.52  $\mu\text{mol}$ ) in 2 steps as previously described<sup>5</sup> to give the title peptide in 28% yield (3.40 mg, 1.84  $\mu\text{mol}$ ) over two steps as a white solid. The purity of the isolated peptide was determined by analytical HPLC [C18;  $t = 0$  min 0% of solvent B in solvent A;  $t = 20$  min 30% of solvent B in solvent A; 1 mL/min; 214 nm;  $T_R = 8.830$  min], and the identity of pyrophosphopeptide **PP-7** was confirmed by mass spectrometry (HRMS  $[M+2H]^{2+}$  calcd for  $C_{67}H_{109}N_{21}O_{36}P_2^{2+}$  922.8404, found 922.8409;  $[M+3H]^{3+}$  calcd for  $C_{67}H_{110}N_{21}O_{36}P_2^{3+}$  615.5627, found 615.5619;  $[M+4H]^{4+}$  calcd for  $C_{67}H_{111}N_{21}O_{36}P_2^{4+}$  461.9238, found 461.9221) and  $^{31}\text{P}$  NMR (202 MHz,  $\text{H}_2\text{O}$ , pH = 7.75)  $\delta$  -6.43 (d,  $^2J_{P,P} = 21.5$  Hz), -10.86 (d,  $^2J_{P,P} = 21.5$  Hz).

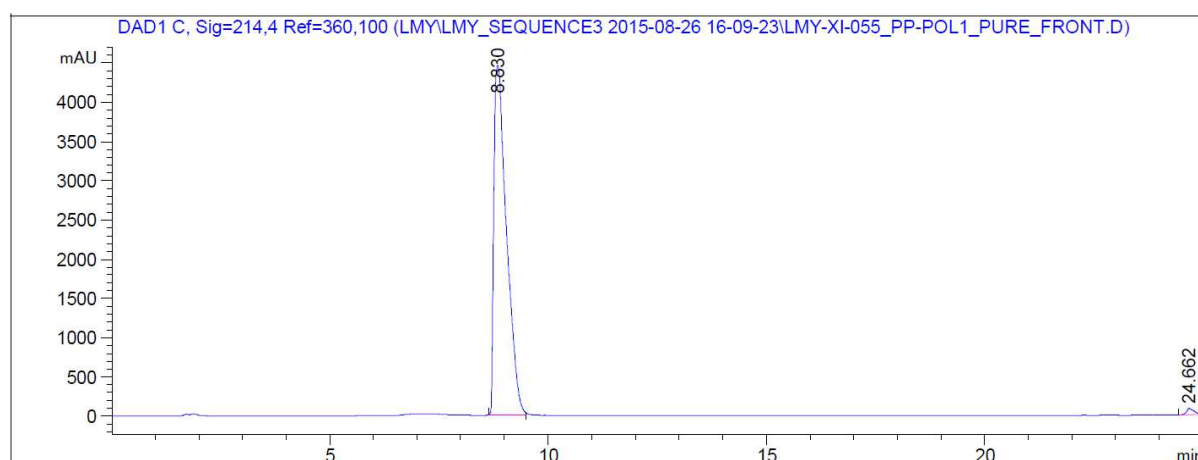



Peptide **PP-8** (ISIDppTSDEESELKK)

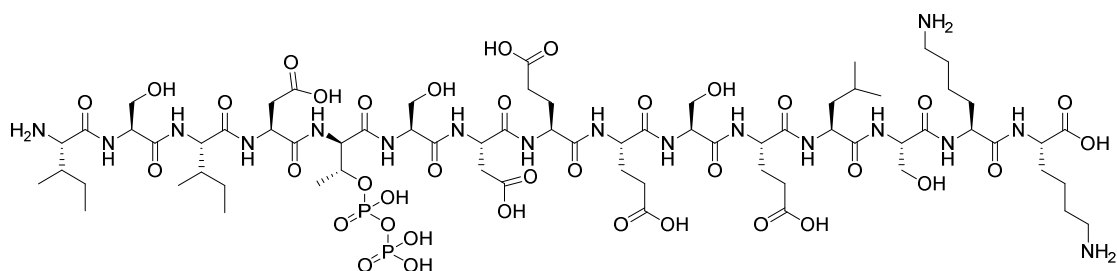

The purity of the isolated peptide was confirmed by analytical HPLC [C18;  $t = 0$  min 0% of solvent B in solvent A;  $t = 20$  min 47% of solvent B in solvent A; 1 mL/min; 214 nm;  $T_R = 10.463$  min], and the identity of pyrophosphopeptide **PP-8** was confirmed by mass spectrometry (HRMS  $[M+2H]^{2+}$  calcd for  $C_{69}H_{121}N_{17}O_{37}P_2^{2+}$  921.8820, found 921.0145;  $[M+3H]^{3+}$  calcd for  $C_{68}H_{119}N_{17}O_{37}P_2^{2+}$  614.2549, found 614.3337) and  $^{31}P$  NMR (202 MHz,  $H_2O$ , pH = 7.91)  $\delta$  -6.97 (d,  $^2J_{P-P} = 20.4$  Hz), -11.73 (d,  $^2J_{P-P} = 20.5$  Hz).

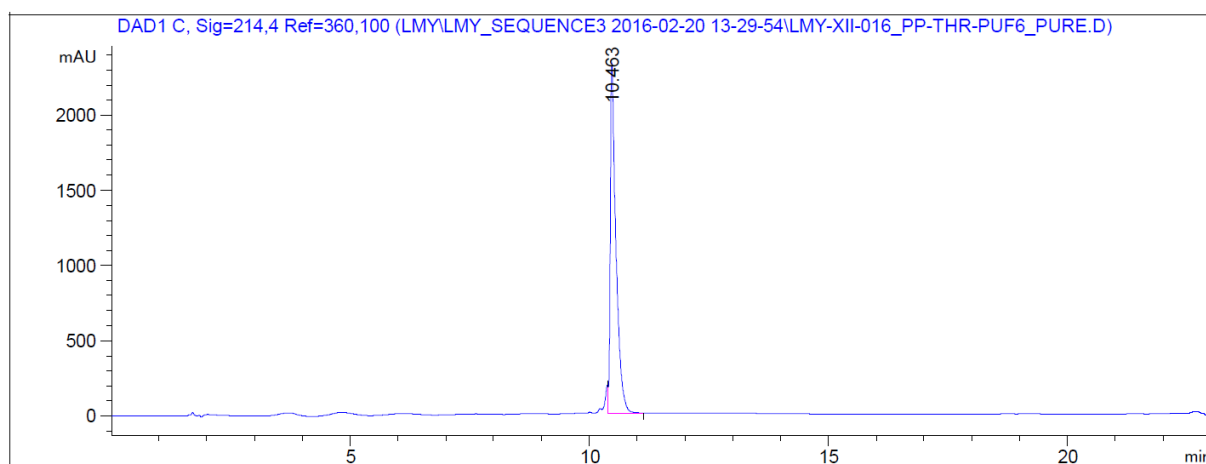

Supplement: Supplementary file 1 [file 7708408]
